# Supplementary material for: Convenient and sensitive detection of norfloxacin with fluorescent carbon dots
Source: Royal Society of Chemistry journal article supplement (doi:10.1039/c4tb01385a), 2014-10-03
Supplement: c4tb01385a1.pdf [file c4tb01385a1.pdf]

## Convenient and sensitive detection of norfloxacin with fluorescent carbon dots (Supporting Information)

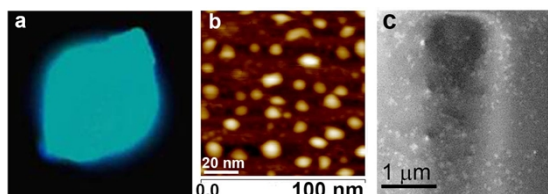

**Figure S1** (a) Fluorescent microscopy image of CDs under excitation of 360 nm. (b) Atomic force microscopy (AFM) image of CDs. (c) Scanning electron microscopy (SEM) image of CDs.

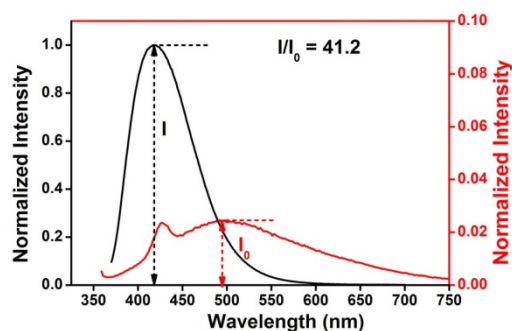

**Figure S2** PL spectra of CDs and CDs-NOR system with NOR concentration of  $9.93 \times 10^{-5} \text{ mol} \cdot \text{L}^{-1}$  (25 °C, pH=7.4, red trace-CDs; black trace-CDs-NOR).

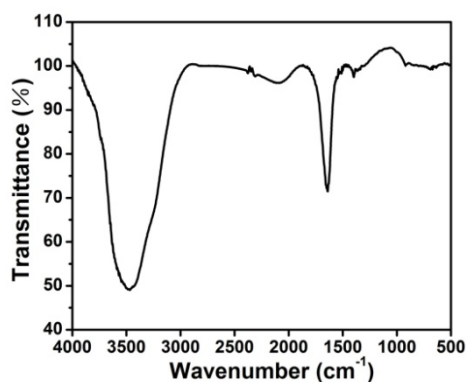

**Figure S3** FTIR spectrum of hydroxyl-group-free CDs.

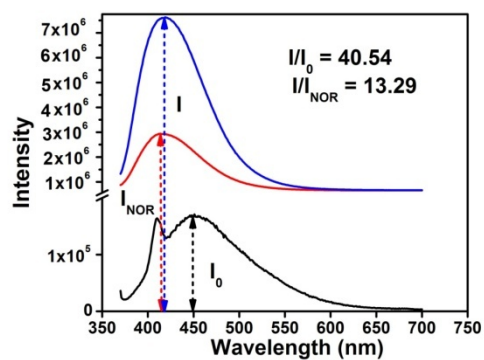

**Figure S4.** PL spectra of CDs, NOR and CDs – NOR system with NOR concentration of  $9.77 \times 10^{-5} \text{ mol} \cdot \text{L}^{-1}$  (25 °C, pH=7.4, black trace-CDs; red trace-NOR; blue trace-CDs-NOR system).

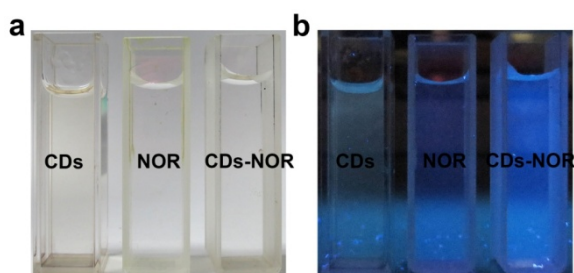

**Figure S5.** Photographs of CDs solution, NOR solution and CDs-NOR solution with NOR concentration of  $9.77 \times 10^{-5} \text{ mol} \cdot \text{L}^{-1}$  (25 °C, pH=7.4) under room light (a) and UV lamp (365 nm, center) illumination (b).

**Table S1** Comparison of detection limit of different methods for the determination of NOR.

| methods                        | detection limit ( $\mu\text{M}$ ) | ref       |
|--------------------------------|-----------------------------------|-----------|
| HPLC                           | 1.57                              | 6         |
| reverse phase-HPLC-fluorescent | 0.24                              | 10        |
| capillary electrophoresis      | 0.31                              | 17        |
| SIA                            | 7.95                              | 21        |
| this method (pH = 5.9)         | 0.0133                            | this work |
| this method (pH = 7.4)         | 0.038                             | this work |

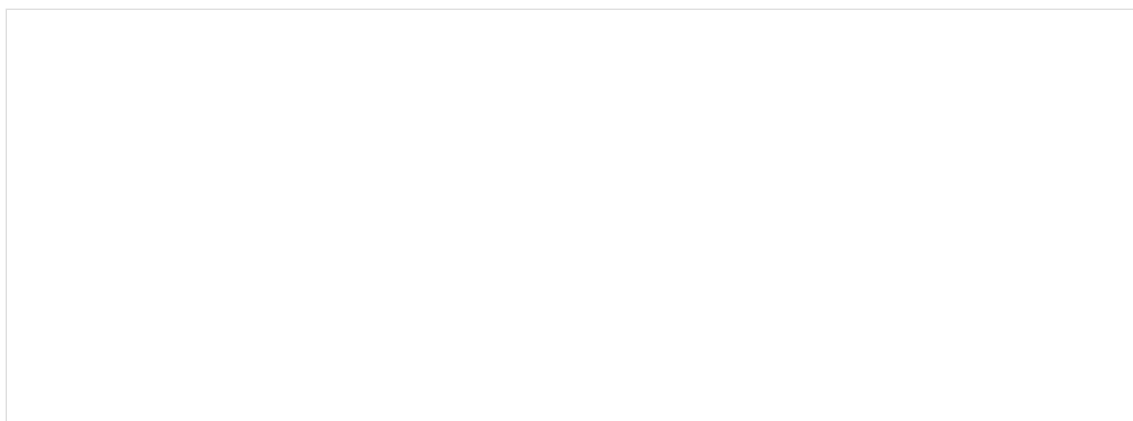

**Table S2.** The  $I/I_0$  when CDs were mixed with other substances.

| Reagent                               | Groups   | $I/I_0$ |
|---------------------------------------|----------|---------|
| 1,3-Di(4-pyridyl)propane              | -N       | 1.35    |
| Dibenzoyl-L-tartaric acid monohydrate | -COOH    | 2.30    |
| 3,5-Pyridinedicarboxylic acid         | -N,-COOH | 4.10    |
| flusilazole                           | -F,-N    | 6.53    |
| Isonicotinic acid hydrazide           | -N,-CO   | 1.67    |
| 1,2,4-Triazole                        | -N       | 5.20    |
| Di-P-Toluoyl-L-Tartaric Acid          | -COOH    | 3.43    |
| 1,3,5-Benzenetricarboxylic acid       | -COOH    | 1.78    |
| Imidazole                             | -N       | 3.45    |
| 2,4 Diamino-6-hydroxypyrimidine       | -N,-OH   | 8.45    |
| o-Difluoro Benzene                    | -F       | 10.23   |
| Benzene                               | -        | 0.65    |

**Table S3.** The  $I/I_0$  when different amount of hydrazine hydrate was added into the CDs solution.

| CDs (mL) | Hydrazine Hydrate (mL) | Amount of Oxygen-Groups (mol·L <sup>-1</sup> ) | $I/I_0$ |
|----------|------------------------|------------------------------------------------|---------|
| 3        | 0.00                   | $6.75 \times 10^{-4}$                          | 42.39   |
| 3        | 0.10                   | $5.5 \times 10^{-4}$                           | 35.45   |
| 3        | 0.20                   | $4.5 \times 10^{-4}$                           | 32.35   |
| 3        | 0.30                   | $3.5 \times 10^{-4}$                           | 30.32   |
| 3        | 0.40                   | $3 \times 10^{-4}$                             | 25.50   |
| 3        | 0.50                   | $2 \times 10^{-4}$                             | 23.34   |
| 3        | 0.60                   | $1.5 \times 10^{-4}$                           | 15.78   |
